# Supplementary material for: Decay events observed in regions of extensive air showers of local electron density > 40m$sup -2$
Source: HighWire-hosted journal article supplement (doi:10.1136/bmjopen-2020-047640), 1973-01-01
Supplement: bmjopen-2020-047640supp001_data_supplement.pdf [file bmjopen-2020-047640supp001_data_supplement.pdf]

### List of supplementary figures

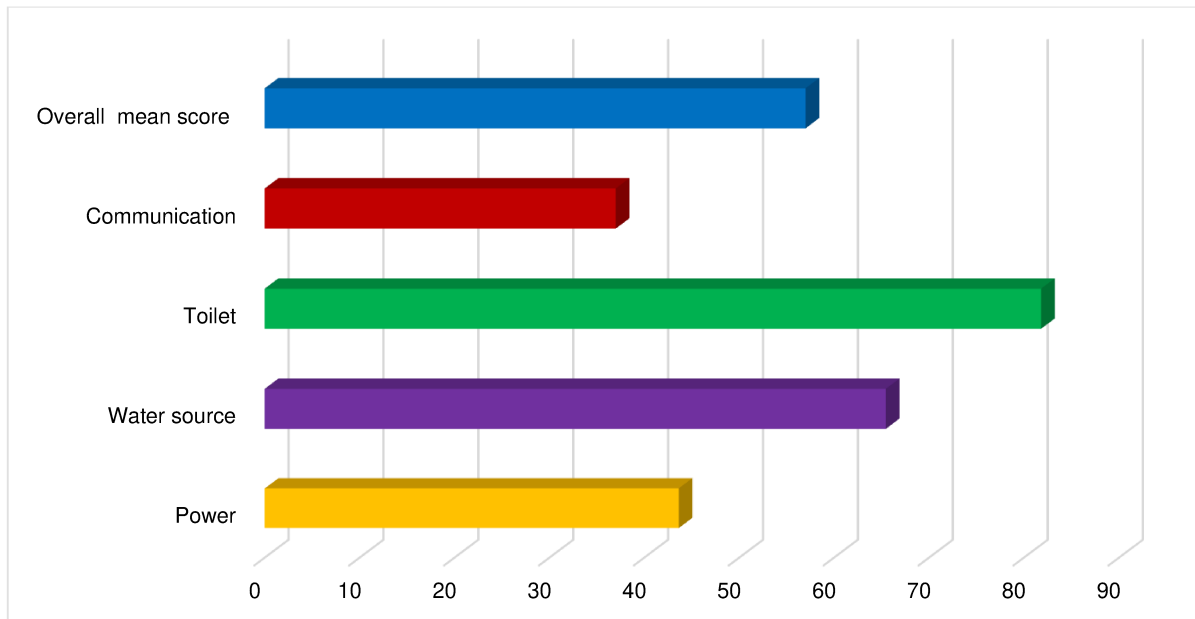

Supplementary figure 1: Percentages of mean score of basic amenities by tracer items

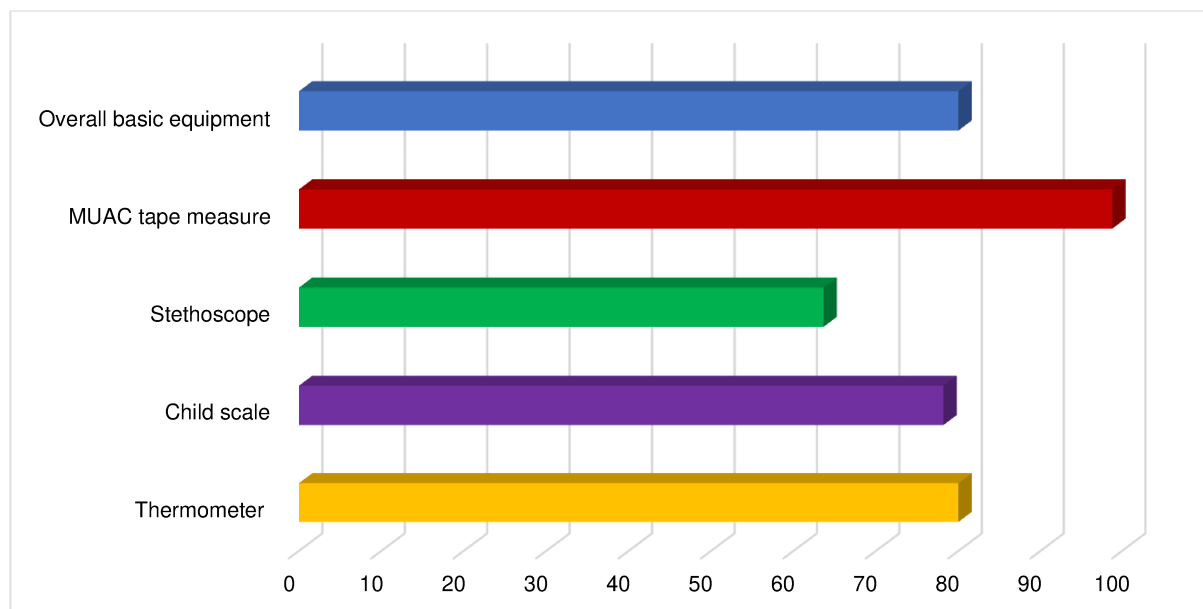

Supplementary figure 2: Percentages of mean score of basic equipment by tracer items

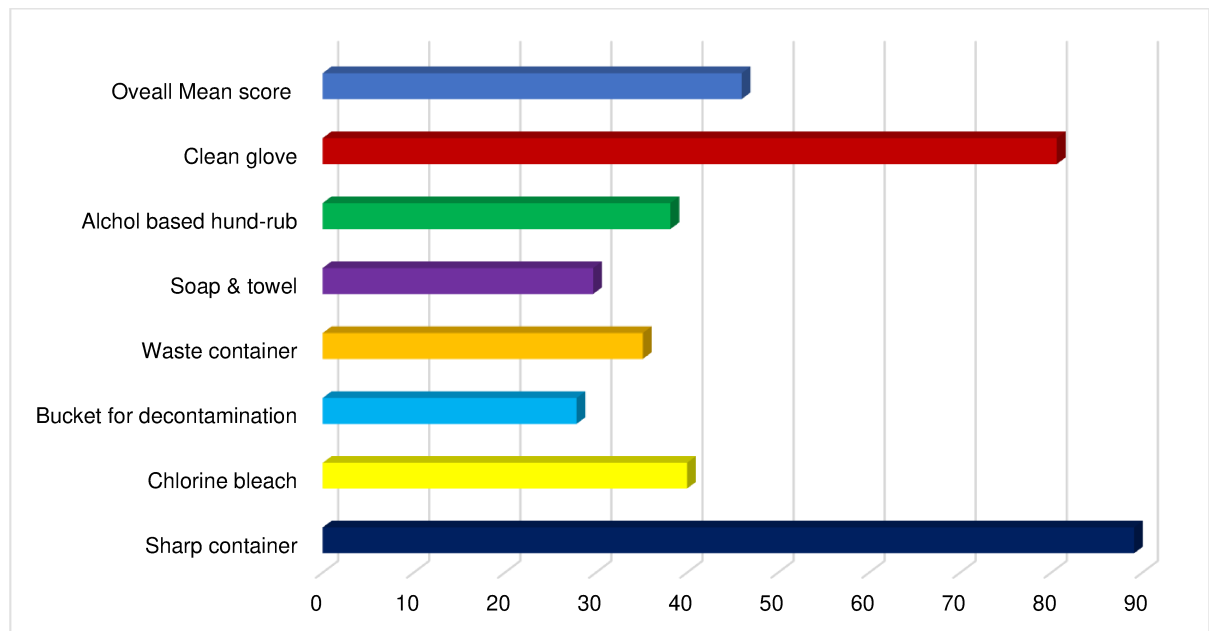

Supplementary figure 3: Percentages of mean score of standard precaution for infection prevention by tracer items.

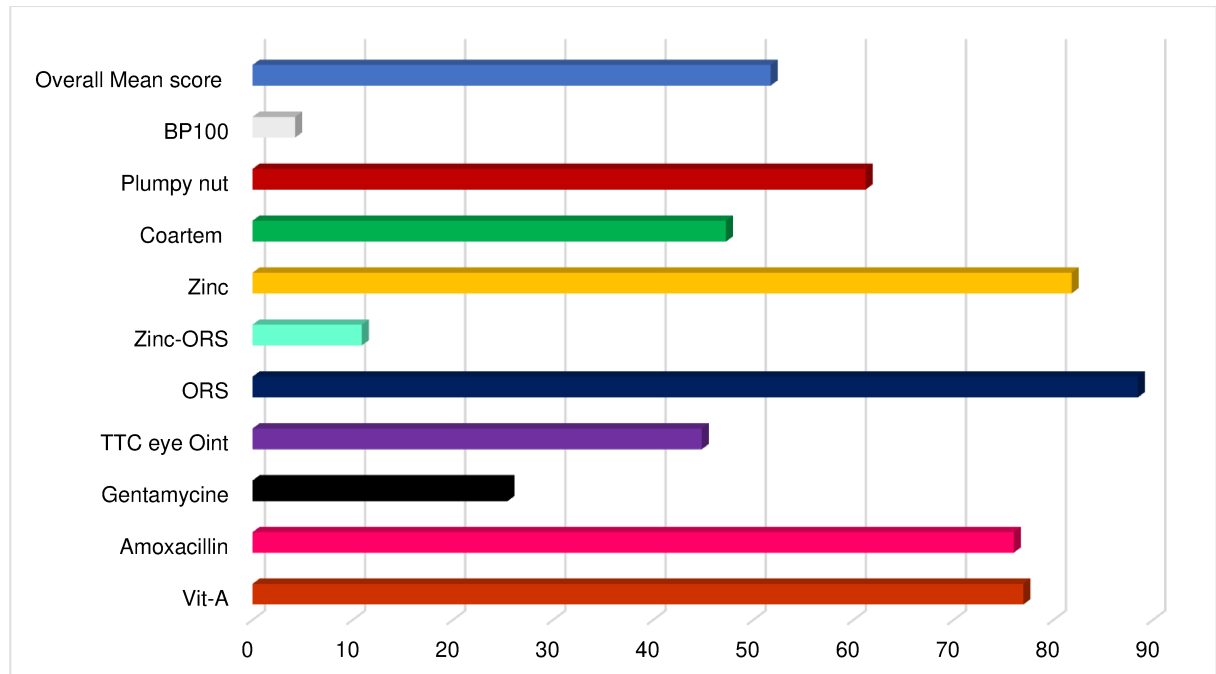

Supplementary figure 4: Percentages of mean score of essential medicines by tracer items.
