# Supplementary material for: Decay events observed in regions of extensive air showers of local electron density > 40m$sup -2$
Source: HighWire-hosted journal article supplement (doi:10.1136/bmjopen-2020-047640), 1973-01-01
Supplement: bmjopen-2020-047640supp002_data_supplement.pdf [file bmjopen-2020-047640supp002_data_supplement.pdf]

### List of Supplementary tables

Supplementary table 1: Health post and child factors associated with referrals of 0 – 59 months sick young children in four regions of Ethiopia

| Characteristics                                   | Referral status of 0 – 59 days old sick young infants |                                |         | Referral status of 2 – 59 months old children |                                 |         |
|---------------------------------------------------|-------------------------------------------------------|--------------------------------|---------|-----------------------------------------------|---------------------------------|---------|
|                                                   | Referred<br>N=39<br>n (%)                             | Not referred<br>N=190<br>n (%) | P-value | Referred<br>N=78<br>n (%)                     | Not referred<br>N=1045<br>n (%) | P-value |
| <i>The health post</i>                            |                                                       |                                |         |                                               |                                 |         |
| Mean score of basic amenities                     |                                                       |                                |         |                                               |                                 |         |
| 0 to 33 percent                                   | 13 (24)                                               | 42 (76)                        | 0.466   | 20 (13)                                       | 129 (87)                        | 0.043   |
| 34 to 66 percent                                  | 9 (15)                                                | 50 (85)                        |         | 19 (6)                                        | 292 (94)                        |         |
| 67 to 100 percent                                 | 17 (15)                                               | 98 (85)                        |         | 39 (6)                                        | 624 (94)                        |         |
| Mean score of basic equipment                     |                                                       |                                |         |                                               |                                 |         |
| 0 to 33 percent                                   | 2 (22)                                                | 7 (78)                         | 0.825   | 3 (4)                                         | 73 (96)                         | 0.512   |
| 34 to 66 percent                                  | 10 (19)                                               | 43 (81)                        |         | 12 (8)                                        | 147 (92)                        |         |
| 67 to 100 percent                                 | 27 (16)                                               | 140 (84)                       |         | 63 (7)                                        | 825 (93)                        |         |
| Mean score of standard precaution                 |                                                       |                                |         |                                               |                                 |         |
| 0 to 33 percent                                   | 4 (9)                                                 | 40 (91)                        | 0.527   | 30 (8)                                        | 353 (92)                        | 0.279   |
| 34 to 66 percent                                  | 14 (19)                                               | 59 (81)                        |         | 31 (8)                                        | 355 (92)                        |         |
| 67 to 100 percent                                 | 21 (19)                                               | 91 (81)                        |         | 17 (5)                                        | 337 (95)                        |         |
| Rapid diagnostic test (RDT)                       |                                                       |                                |         |                                               |                                 |         |
| 0 to 33 percent                                   | 10 (17)                                               | 50 (83)                        | 0.947   | 47 (9)                                        | 467 (91)                        | 0.026   |
| 34 to 66 percent                                  | 0                                                     | 0                              |         | 0                                             | 0                               |         |
| 67 to 100 percent                                 | 29 (17)                                               | 140 (83)                       |         | 31 (5)                                        | 578 (95)                        |         |
| Mean score of essential medicines                 |                                                       |                                |         |                                               |                                 |         |
| 0 to 33 percent                                   | 1 (8)                                                 | 11 (92)                        | 0.026   | 17 (18)                                       | 77 (82)                         | 0.001   |
| 34 to 66 percent                                  | 32 (21)                                               | 113 (79)                       |         | 43 (6)                                        | 697 (94)                        |         |
| 67 to 100 percent                                 | 6 (8)                                                 | 66 (92)                        |         | 18 (6)                                        | 271 (94)                        |         |
| Health post's overall service readiness index     |                                                       |                                |         |                                               |                                 |         |
| 0 to 33 percent                                   | 0 (0)                                                 | 1 (0)                          | 0.737   | 7 (18)                                        | 31 (82)                         | 0.193   |
| 34 to 66 percent                                  | 22 (19)                                               | 93 (81)                        |         | 43 (7)                                        | 575 (93)                        |         |
| 67 to 100 percent                                 | 17 (15)                                               | 96 (85)                        |         | 28 (6)                                        | 439 (94)                        |         |
| Number of health extension worker per health post |                                                       |                                |         |                                               |                                 |         |

|                                                                            |                                             |         |          |       |         |           |       |
|----------------------------------------------------------------------------|---------------------------------------------|---------|----------|-------|---------|-----------|-------|
|                                                                            | 1                                           | 2 (5)   | 39 (95)  |       | 20 (9)  | 196 (81)  |       |
|                                                                            | 2 or more                                   | 37 (20) | 151 (80) | 0.024 | 58 (6)  | 849 (94)  | 0.264 |
| <i>Distance between health post and the nearest referral health centre</i> |                                             |         |          |       |         |           |       |
| Distance to the next referral site <sup>b</sup>                            |                                             |         |          |       |         |           |       |
|                                                                            | 0 - 8 kms                                   | 16 (21) | 61 (79)  |       |         |           |       |
|                                                                            | 8.01 - 20 kms                               | 10 (12) | 71 (88)  | 0.554 |         |           |       |
|                                                                            | >20 kms                                     | 13 (19) | 57 (81)  |       |         |           |       |
|                                                                            | 0 - 8 kms                                   |         |          |       | 24 (7)  | 340 (93)  |       |
|                                                                            | 8.01 - 14 kms                               |         |          |       | 25 (8)  | 301 (92)  | 0.699 |
|                                                                            | >14 kms                                     |         |          |       | 22 (6)  | 362 (94)  |       |
| <i>The child</i>                                                           |                                             |         |          |       |         |           |       |
| Region                                                                     |                                             |         |          |       |         |           |       |
|                                                                            | Amhara                                      | 3 (25)  | 9 (75)   |       | 34 (7)  | 428 (93)  |       |
|                                                                            | Oromia                                      | 10 (13) | 65 (87)  | 0.722 | 26 (7)  | 342 (93)  | 0.691 |
|                                                                            | SNNPR <sup>a</sup>                          | 9 (21)  | 33 (79)  |       | 11 (8)  | 128 (92)  |       |
|                                                                            | Tigray                                      | 17 (17) | 83 (83)  |       | 7 (5)   | 147 (95)  |       |
| Age                                                                        |                                             |         |          |       |         |           |       |
|                                                                            | 1 <sup>st</sup> week                        | 14 (24) | 45 (76)  |       |         |           |       |
|                                                                            | 2 - 4 weeks                                 | 16 (16) | 82 (84)  | 0.353 |         |           |       |
|                                                                            | 5 - 8 weeks                                 | 9 (13)  | 63 (87)  |       |         |           |       |
|                                                                            | 2 - 11 months                               |         |          |       | 26 (8)  | 294 (92)  |       |
|                                                                            | 12 - 23 months                              |         |          |       | 28 (8)  | 325 (92)  | 0.249 |
|                                                                            | 24 - 59 months                              |         |          |       | 24 (5)  | 426 (95)  |       |
| Sex                                                                        |                                             |         |          |       |         |           |       |
|                                                                            | Boy                                         | 18 (15) | 106 (85) | 0.395 | 40 (7)  | 550 (93)  | 0.810 |
|                                                                            | Girl                                        | 21 (20) | 84 (80)  |       | 38 (7)  | 495 (93)  |       |
| Disease classification                                                     |                                             |         |          |       |         |           |       |
|                                                                            | Non-severe illnesses not requiring referral | 21 (12) | 159 (88) | 0.013 | 56 (5)  | 1023 (95) | 0.001 |
|                                                                            | Severe illnesses requiring referral         | 18 (37) | 31 (63)  |       | 22 (50) | 22 (50)   |       |

<sup>a</sup> SNNPR - Southern Nations, Nationalities, and Peoples Region

<sup>b</sup> GIS based data of distance from health post to health centre were missing for 0-59 days sick young infant (1) and 2-59 months sick children (49).

Supplementary table 2: Individual health post readiness factors associated with referrals of 0-59 months sick children in four regions of Ethiopia

| Characteristics                         | Referral status of 0 – 59 days sick young infants |                                |         | Referral status of 2 – 59 months old children |                             |         |
|-----------------------------------------|---------------------------------------------------|--------------------------------|---------|-----------------------------------------------|-----------------------------|---------|
|                                         | Referred<br>N=39<br>n (%)                         | Not referred<br>N=190<br>n (%) | P-value | Referred<br>N=78<br>n (%)                     | Referred<br>N=1045<br>n (%) | P-value |
| <i>Availability of basic amenities</i>  |                                                   |                                |         |                                               |                             |         |
| Water source                            | Not available                                     | 15 (22)                        | 0.296   | 30 (8)                                        | 356 (92)                    | 0.558   |
|                                         | Available                                         | 24 (15)                        |         | 48 (7)                                        | 689 (93)                    |         |
| Electric power                          | Not available                                     | 18 (17)                        | 0.886   | 51 (8)                                        | 602 (92)                    | 0.257   |
|                                         | Available                                         | 21 (18)                        |         | 27 (6)                                        | 443 (94)                    |         |
| Facility owned toilet                   | Not available                                     | 6 (18)                         | 0.880   | 14 (7)                                        | 207 (93)                    | 0.981   |
|                                         | Available                                         | 33 (17)                        |         | 64 (7)                                        | 838 (93)                    |         |
| Facility owned landline or mobile phone | Not available                                     | 35 (19)                        | 0.133   | 51 (6)                                        | 828 (94)                    | 0.038   |
|                                         | Available                                         | 4 (10)                         |         | 27 (11)                                       | 217 (89)                    |         |
| <i>Availability of basic equipment</i>  |                                                   |                                |         |                                               |                             |         |
| Thermometer                             | Not available                                     | 8 (14)                         | 0.594   | 12 (5)                                        | 228 (95)                    | 0.207   |
|                                         | Available                                         | 31 (18)                        |         | 66 (8)                                        | 817 (92)                    |         |
| Child weight scale                      | Not available                                     | 5 (13)                         | 0.526   | 20 (9)                                        | 214 (91)                    | 0.388   |
|                                         | Available                                         | 34 (18)                        |         | 58 (7)                                        | 831 (93)                    |         |
| Stethoscope                             | Not available                                     | 18 (19)                        | 0.709   | 35 (8)                                        | 399 (92)                    | 0.336   |
|                                         | Available                                         | 21 (16)                        |         | 43 (6)                                        | 646 (94)                    |         |
| MUAC tape measure                       | Not available                                     | 1 (100)                        | 0.040   | 0 (0)                                         | 14 (100)                    | 0.701   |
|                                         | Available                                         | 38 (17)                        |         | 78 (7)                                        | 1031 (93)                   |         |
| <i>Availability diagnostics</i>         |                                                   |                                |         |                                               |                             |         |
| Rapid diagnostic test (RDT)             | Not available                                     | 10 (17)                        | 0.947   | 47 (9)                                        | 467 (91)                    | 0.026   |
|                                         | Available                                         | 29 (17)                        |         | 31 (5)                                        | 578 (95)                    |         |

| <i>Availability of essential medicines</i> |               |         |          |       |         |          |       |
|--------------------------------------------|---------------|---------|----------|-------|---------|----------|-------|
| Vitamin A                                  | Not available | 9 (27)  | 25 (73)  | 0.211 | 11 (5)  | 207 (95) | 0.214 |
|                                            | Available     | 30 (15) | 165 (85) |       | 67 (7)  | 838 (93) |       |
| Amoxicillin                                | Not available | 6 (14)  | 36 (86)  | 0.745 | 28 (15) | 159 (85) | 0.001 |
|                                            | Available     | 33 (18) | 154 (82) |       | 50 (5)  | 886 (95) |       |
| Gentamycin                                 | Not available | 20 (14) | 127 (86) | 0.201 |         |          |       |
|                                            | Available     | 19 (23) | 63 (77)  |       |         |          |       |
| Tetracycline eye ointment                  | Not available | 26 (19) | 110 (81) | 0.457 | 46 (8)  | 567 (92) | 0.554 |
|                                            | Available     | 13 (14) | 80 (86)  |       | 32 (6)  | 478 (94) |       |
| Oral rehydration solution (ORS)            | Not available | 2 (13)  | 13 (87)  | 0.627 | 10 (17) | 48 (83)  | 0.048 |
|                                            | Available     | 37 (17) | 177 (83) |       | 68 (6)  | 997 (94) |       |
| Zinc-ORS                                   | Not available |         |          |       | 69 (7)  | 947 (93) | 0.608 |
|                                            | Available     |         |          |       | 9 (8)   | 98 (92)  |       |
| Zinc                                       | Not available |         |          |       | 16 (9)  | 152 (91) | 0.331 |
|                                            | Available     |         |          |       | 62 (7)  | 893 (93) |       |
| Coartem                                    | Not available | 18 (20) | 71 (80)  | 0.494 | 47 (9)  | 507 (91) | 0.087 |
|                                            | Available     | 21 (15) | 119 (85) |       | 31 (5)  | 535 (95) |       |
| Plumpy Nut                                 | Not available | 8 (23)  | 27 (77)  | 0.404 | 30 (8)  | 372 (92) | 0.688 |
|                                            | Available     | 31 (16) | 163 (84) |       | 48 (7)  | 673 (93) |       |
| BP100                                      | Not available | 38 (17) | 180 (83) | 0.012 | 77 (7)  | 993 (93) | 0.107 |
|                                            | Available     | 1 (9)   | 10 (91)  |       | 1 (2)   | 52 (98)  |       |
